# Supplementary material for: Histidine dephosphorylation of the Gβ protein GPB‐1 promotes axon regeneration in C. elegans
Source: PubMed Central journal article supplement (PMC9724660; doi:10.15252/embr.202255076), 2022-10-24
Supplement: EMBR-23-e55076-s001.pdf [file EMBR-23-e55076-s001.pdf]

# Appendix

| <b>Table of contents</b> | <b>Page</b> |
|--------------------------|-------------|
| Appendix Table S1        | 2           |
| Appendix Table S2        | 3           |
| Appendix Table S3        | 4           |
| Appendix Figure S1       | 5           |
| Appendix Figure S2       | 7           |
| Appendix Figure S3       | 8           |
| Appendix Figure S4       | 9           |
| Appendix Figure S5       | 11          |

**Appendix Table S1.** PHIP-1(H45A) binding proteins identified by yeast two-hybrid screen.

| <b>Gene</b>          | <b>Gene product</b>        | <b>Number of colonies</b> |
|----------------------|----------------------------|---------------------------|
| <i><b>gpb-1</b></i>  | <b>G<math>\beta</math></b> | <b>1</b>                  |
| <i><b>gpd-2</b></i>  | <b>GAPDH</b>               | <b>1</b>                  |
| <i><b>gpd-3</b></i>  |                            | <b>12</b>                 |
| <i><b>gpd-4</b></i>  |                            | <b>8</b>                  |
| <i><b>unc-51</b></i> | <b>ULK homolog</b>         | <b>1</b>                  |

## Appendix Table S2. Strains used in this study.

| Strain | Genotype                                                                  |
|--------|---------------------------------------------------------------------------|
| KU501  | <i>juls76 II</i>                                                          |
| KU96   | <i>phip-1(km96) I; juls76 II</i>                                          |
| KU97   | <i>juls76 II; lhpp-1(km97) V</i>                                          |
| KU98   | <i>goa-1(km98) I; juls76 II</i>                                           |
| KU1461 | <i>phip-1(km96) I; juls76 II; kmEx1461 [Punc-25::<i>phip-1</i>]</i>       |
| KU1462 | <i>phip-1(km96) I; juls76 II; kmEx1462 [Punc-25::<i>phip-1</i>(H45A)]</i> |
| KU1463 | <i>juls76 II; kmEx1463 [Punc-25::<i>ndk-1</i>]</i>                        |
| KU1464 | <i>juls76 II; kmEx1464 [Punc-25::<i>ndk-1</i>(H118N)]</i>                 |
| KU1465 | <i>gpb-1(H266F) juls76 II</i>                                             |
| KU1466 | <i>phip-1(km96) I; gpb-1(H266F) juls76 II</i>                             |
| KU1467 | <i>gpb-1(H266F) juls76 II; kmEx1463 [Punc-25::<i>ndk-1</i>]</i>           |
| KU1468 | <i>goa-1(km98) phip-1(km96) I; juls76 II</i>                              |
| KU455  | <i>goa-1(Q205L) I; juls76 II</i>                                          |
| KU1469 | <i>goa-1(Q205L) I; gpb-1(H266F) juls76 II</i>                             |
| KU1343 | <i>muls32 II</i>                                                          |
| KU1470 | <i>muls32 II; unc-51(ks49) V</i>                                          |
| KU1471 | <i>phip-1(km96) I; muls32 II</i>                                          |
| KU1472 | <i>phip-1(S112A) I; muls32 II</i>                                         |
| KU1473 | <i>phip-1(S112E) I; muls32 II</i>                                         |
| KU1474 | <i>phip-1(S112E) I; muls32 II; unc-51(ks49) V</i>                         |
| KU1475 | <i>gpb-1(H266F) muls32 II; unc-51(ks49) V</i>                             |
| KU1476 | <i>muls32 II; lgg-2(tm6544) IV</i>                                        |
| KU1477 | <i>phip-1(km96) I; muls32 II; lgg-2(tm6544) IV</i>                        |
| KU1478 | <i>3XFLAG::<i>gpb-1</i> juls76 II</i>                                     |
| KU1479 | <i>phip-1(km96) I; 3XFLAG::<i>gpb-1</i> juls76 II</i>                     |
| KU1480 | <i>phip-1(km96) I; 3XFLAG::<i>gpb-1</i>(H266F) juls76 II</i>              |
| KU1481 | <i>juls76 II; unc-51(ks49) V</i>                                          |

## Appendix Table S3. DNA and RNA sequences.

|                      |                                     |                                                                                                                                                                                                    |
|----------------------|-------------------------------------|----------------------------------------------------------------------------------------------------------------------------------------------------------------------------------------------------|
| <i>phip-1(km96)</i>  | crispr RNA                          | gcucgcugacaucgccgaugguuuuagagcuaugcu                                                                                                                                                               |
|                      | PCR primer for genotyping (forward) | ttatcacagtgtgagagcattggg                                                                                                                                                                           |
|                      | PCR primer for genotyping (reverse) | gaagataatgaacaactgctctactc                                                                                                                                                                         |
| <i>lhpp-1(km97)</i>  | crispr RNA                          | aaacucccguuauaucgagcguuuuagagcuaugcu                                                                                                                                                               |
|                      | PCR primer for genotyping (forward) | catctaaacggaccctttctgcc                                                                                                                                                                            |
|                      | PCR primer for genotyping (reverse) | gcacgcaaattgtttaccttgagg                                                                                                                                                                           |
| <i>goa-1(km98)</i>   | crispr RNA                          | cauggguuguaccaugucaguuuuagagcuaugcu                                                                                                                                                                |
|                      | PCR primer for genotyping (forward) | gagctgcaccacatacagtgagtg                                                                                                                                                                           |
|                      | PCR primer for genotyping (reverse) | tacaatagtcgattttctgattctcc                                                                                                                                                                         |
| <i>gpb-1(H266F)</i>  | crispr RNA                          | aaauuuaucaugagaaucaguuuuagagcuaugcu                                                                                                                                                                |
|                      | ssDNA                               | gttcgacattcgctgatcaggaacttgcaatgtatt<br>ctttgataatattatttgcggaatcactagt                                                                                                                            |
|                      | PCR primer for genotyping (forward) | tctccagactccgcacattcatc                                                                                                                                                                            |
|                      | PCR primer for genotyping (reverse) | ttatcgtgaccagccaataactcctg                                                                                                                                                                         |
| <i>phip-1(S112A)</i> | crispr RNA                          | aacauucuuucucuaaugaguuuuagagcuaugcu                                                                                                                                                                |
|                      | ssDNA                               | cattttaaagcagaaataccagattataatatccactt<br>cgcgaaacgacggatattgaatctccatggttgagcatagtt                                                                                                               |
|                      | PCR primer for genotyping (forward) | gtggaatccatgtttaattcccagtggaac                                                                                                                                                                     |
|                      | PCR primer for genotyping (reverse) | gacgctccacaatgtacaatcgtc                                                                                                                                                                           |
| <i>phip-1(S112E)</i> | crispr RNA                          | aacauucuuucucuaaugaguuuuagagcuaugcu                                                                                                                                                                |
|                      | ssDNA                               | cattttaaagcagaaataccagattataatatccactt<br>cgaaaacgacggatattgaatctccatggttgagcatagtt                                                                                                                |
|                      | PCR primer for genotyping (forward) | gtggaatccatgtttaattcccagtggaac                                                                                                                                                                     |
|                      | PCR primer for genotyping (reverse) | gacgctccacaatgtacaatcgtc                                                                                                                                                                           |
| <i>3XFLAG::gpb-1</i> | crispr RNA                          | aaguucgcucaucugcugcguuuuagagcuaugcu                                                                                                                                                                |
|                      | ssDNA                               | cgtcgacacttccatcagtaccatcctccggagcagcaccaccacc<br>agcagcaagatggattacaaagaccatgatggtgactat<br>aaggatcatgatattgactataaagacgatgacgataa<br>gagcgaactgaccaactcgcacaggaggctgaacag<br>ctgaagtcgcagattcggg |
|                      | PCR primer for genotyping (forward) | aaaacgcgaacaccgaccaggagc                                                                                                                                                                           |
|                      | PCR primer for genotyping (reverse) | attgctagaccatgctctggaacg                                                                                                                                                                           |

**A**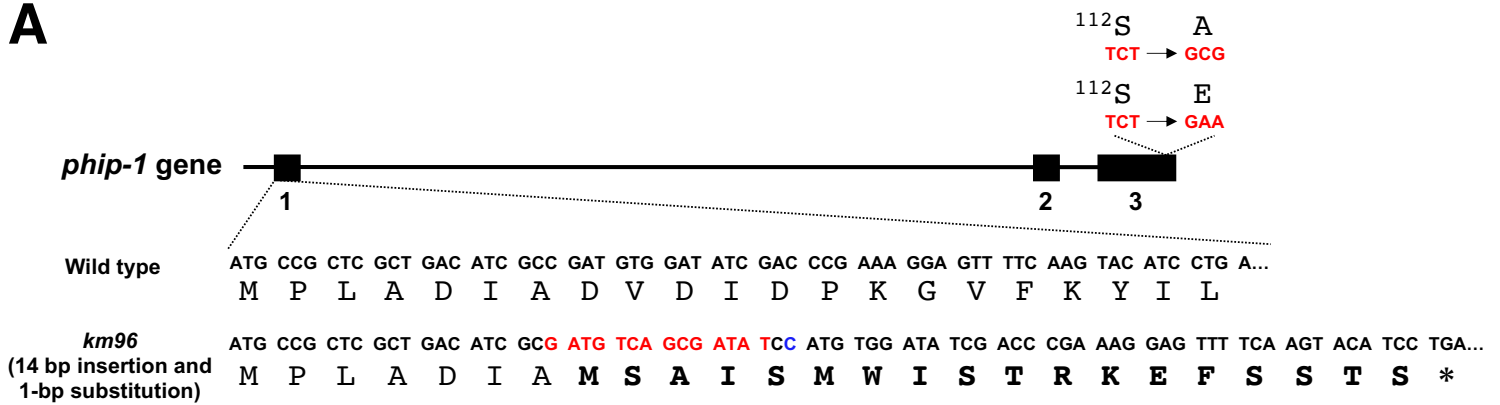**B**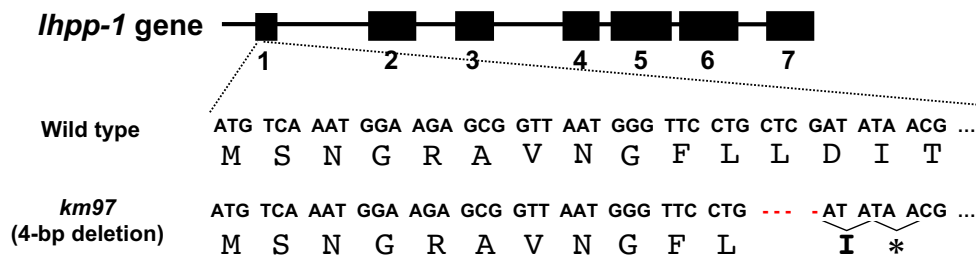**C**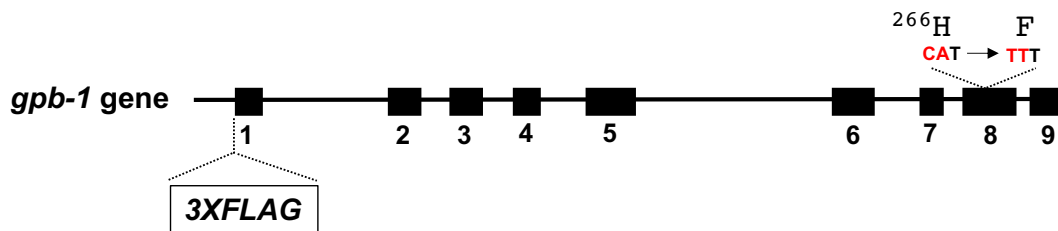**D**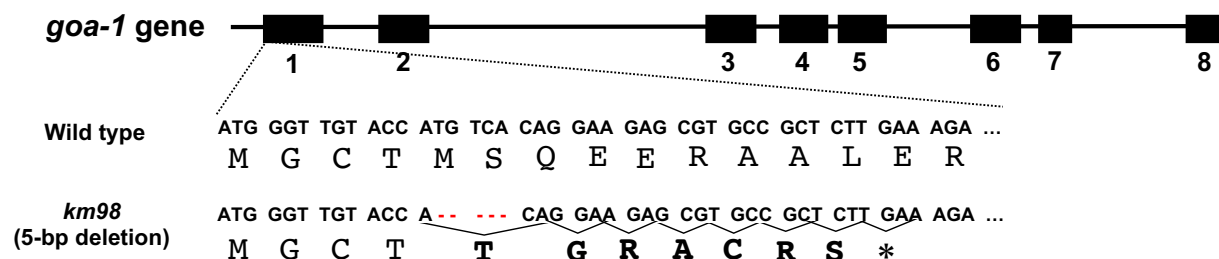

## Appendix Figure S1. Genome editing of *phip-1*, *lhpp-1*, *gpb-1*, and *goa-1*.

A Genomic structure of the *phip-1* gene. Exons are indicated by boxes, while introns and untranslated regions are indicated by bars. The top and bottom letters indicate nucleotides and corresponding amino acids, respectively. The *phip-1(km96)* mutation is a 14 bp insertion (nucleotides in red) with 1-bp substitution (nucleotide in blue), which causes a frameshift (amino acids in bold) and premature stop codon (\*) in exon 1. The *phip-1(S112A)* and *phip-1(S112E)* alleles are also shown.

- B Genomic structure of the *lhpp-1* gene. The *lhpp-1(km97)* mutation is a 4-bp deletion, which causes a frameshift (amino acids in bold) and premature stop codon (\*) in exon 1.
- C Genomic structure of *gpb-1*. A 3XFLAG epitope tag was inserted into the N-terminus at the endogenous *gpb-1* locus with the CRISPR–Cas9 method. The *gpb-1(H266F)* allele is also shown.
- D Genomic structure of the *goa-1* gene. The *goa-1(km98)* mutation is a 5-bp deletion, which causes a frameshift (amino acids in bold) and premature stop codon (\*) in exon 1.

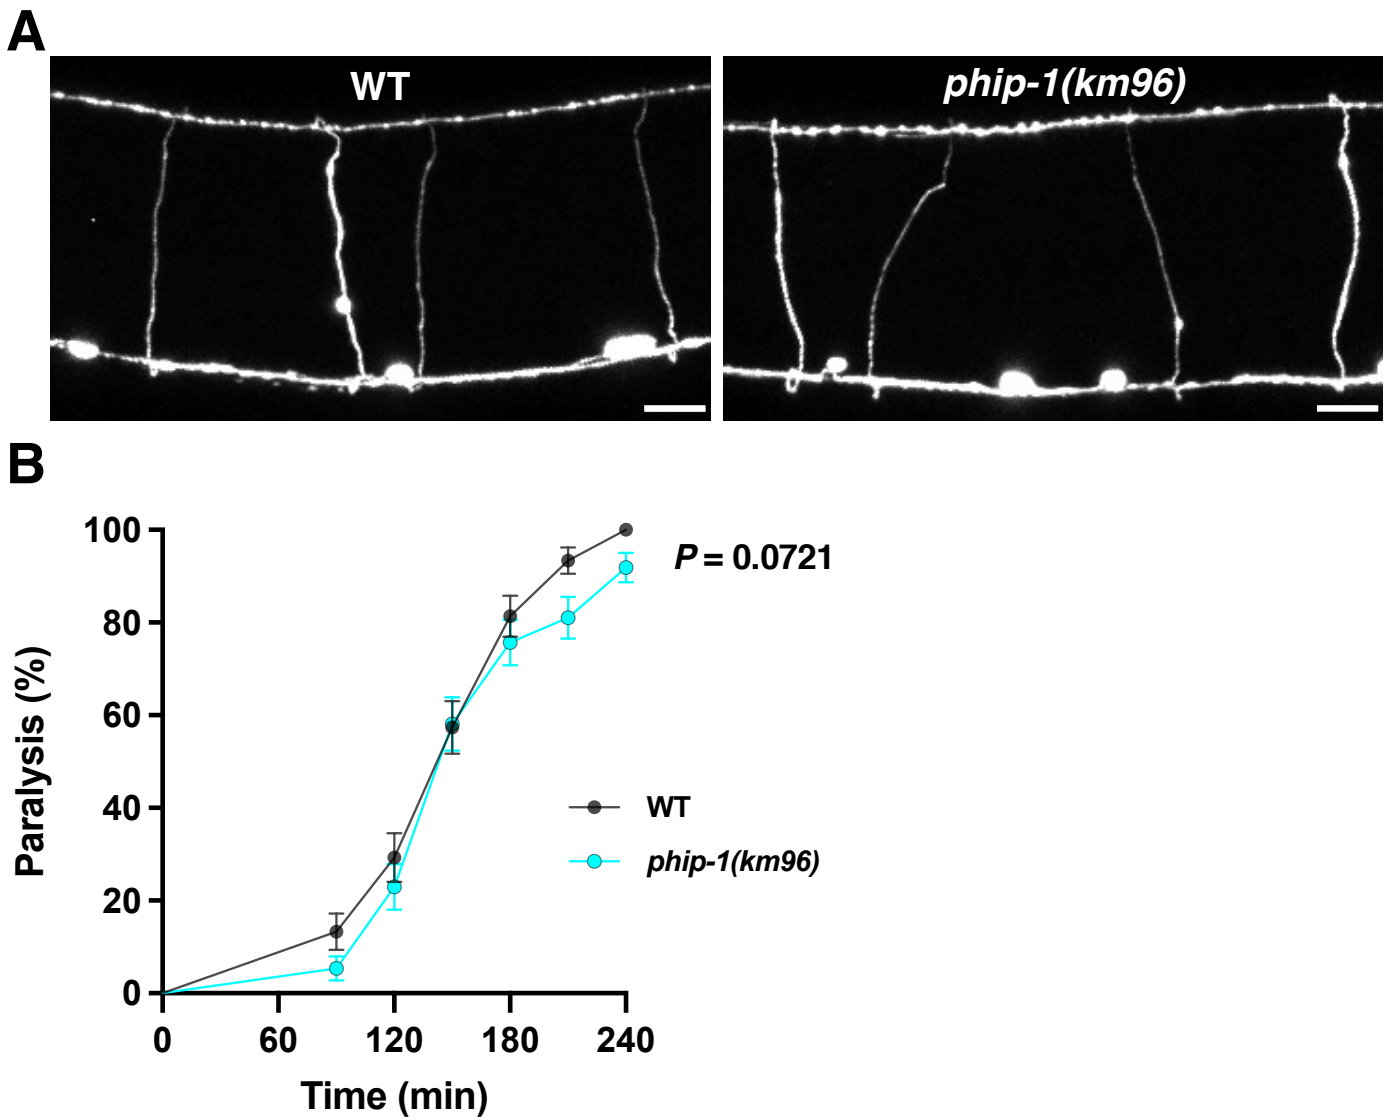

**Appendix Figure S2. Effect of *phip-1* deletion on the morphology and function of D-type motor neurons.**

- A** Morphology of D-type motor neurons. Fluorescent images of D-type motor neurons in wild-type and *phip-1(km96)* young adult animals carrying *Punc-25::gfp* are shown. D neurons are visualized by GFP under the control of the *unc-25* promoter. Scale bar, 10  $\mu\text{m}$ .
- B** Aldicarb-induced paralysis assay. The rate of paralysis in wild-type and *phip-1(km96)* animals in the presence of 1 mM aldicarb are shown. Assays were performed blindly and in triplicate. Statistical significance was determined by the log-rank test. Error bars indicate SE.

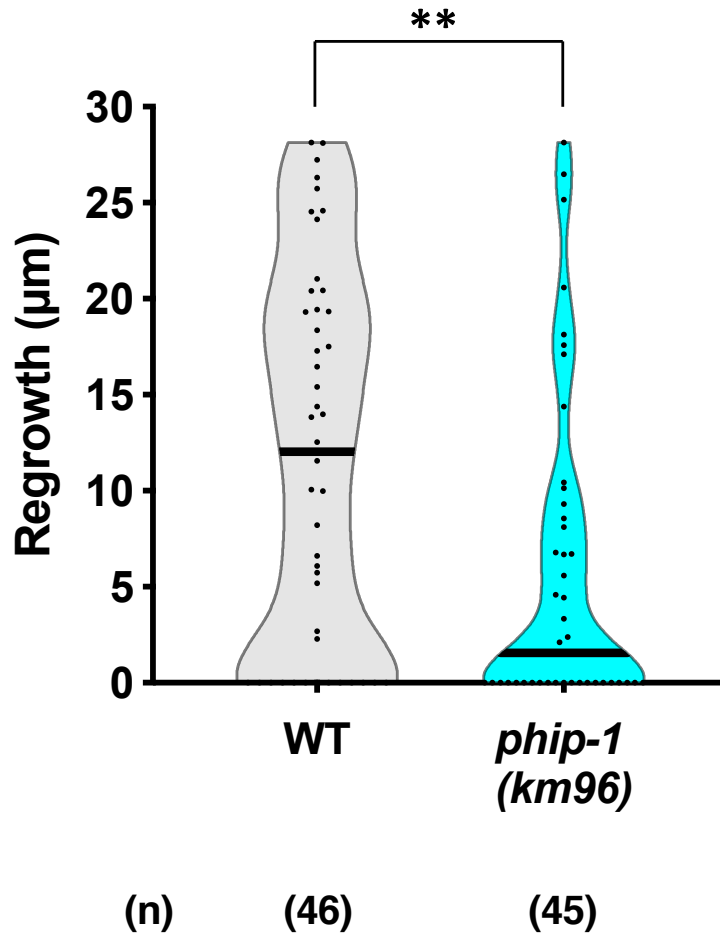

**Appendix Figure S3. Effect of *phip-1* deletion on the length of D-type motor neurons after laser surgery.**

Lengths of regenerating axons 24 h after laser surgery are shown. The number (n) of axons examined is indicated. The black bar in each violin plot indicates the median. \*\* $P < 0.01$ , as determined by the Mann–Whitney test.



**A**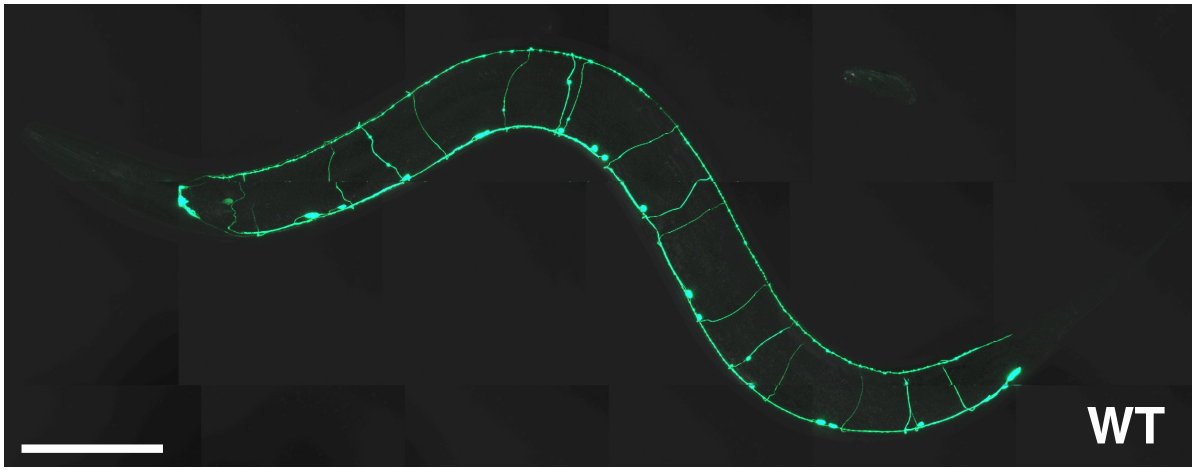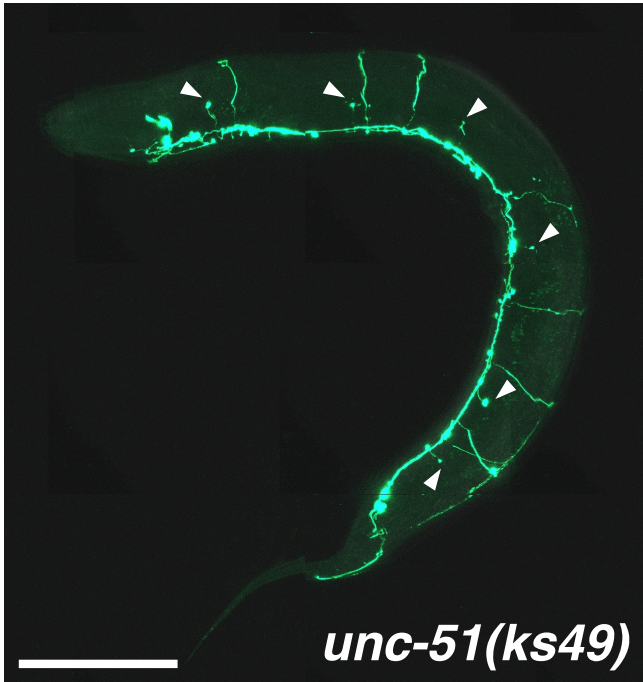**B**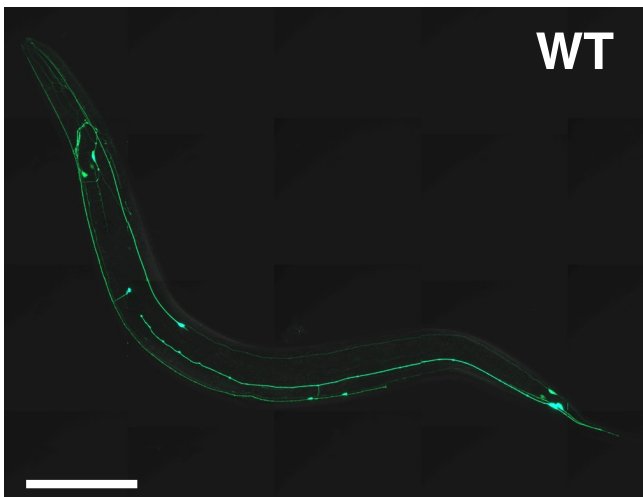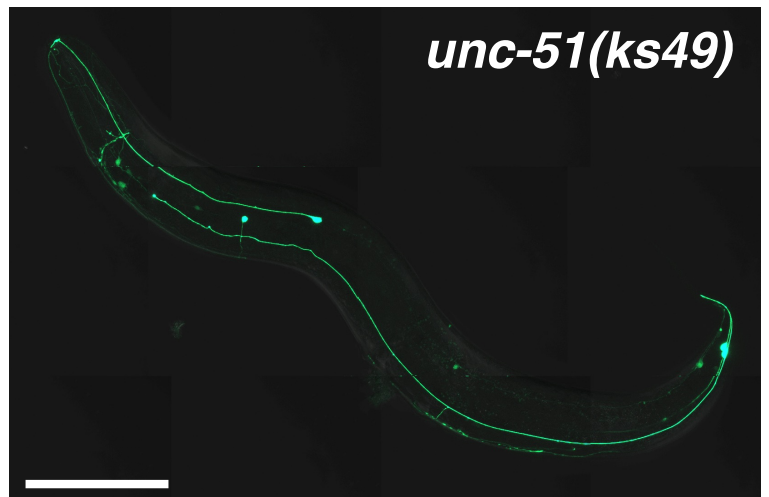

**Appendix Figure S4. Effects of the *unc-51* mutation on the development of D-type motor neurons and PLM neurons.**

- A Morphology of D-type motor neurons. Fluorescent images of D-type motor neurons in wild-type and *unc-51(ks49)* young adult animals carrying *Punc-25::gfp* are shown. D neurons are visualized by GFP under the control of the *unc-25* promoter. White arrowheads indicate axons that failed to elongate from ventral to dorsal side during development. Scale bar, 100  $\mu\text{m}$ .
- B Morphology of PLM neurons. Fluorescent images of PLM neurons in wild-type and *unc-51(ks49)* young adult animals carrying *Pmec-7::gfp* are shown. PLM neurons are visualized by GFP under the control of the *mec-7* promoter. Scale bar, 100  $\mu\text{m}$ .

**A**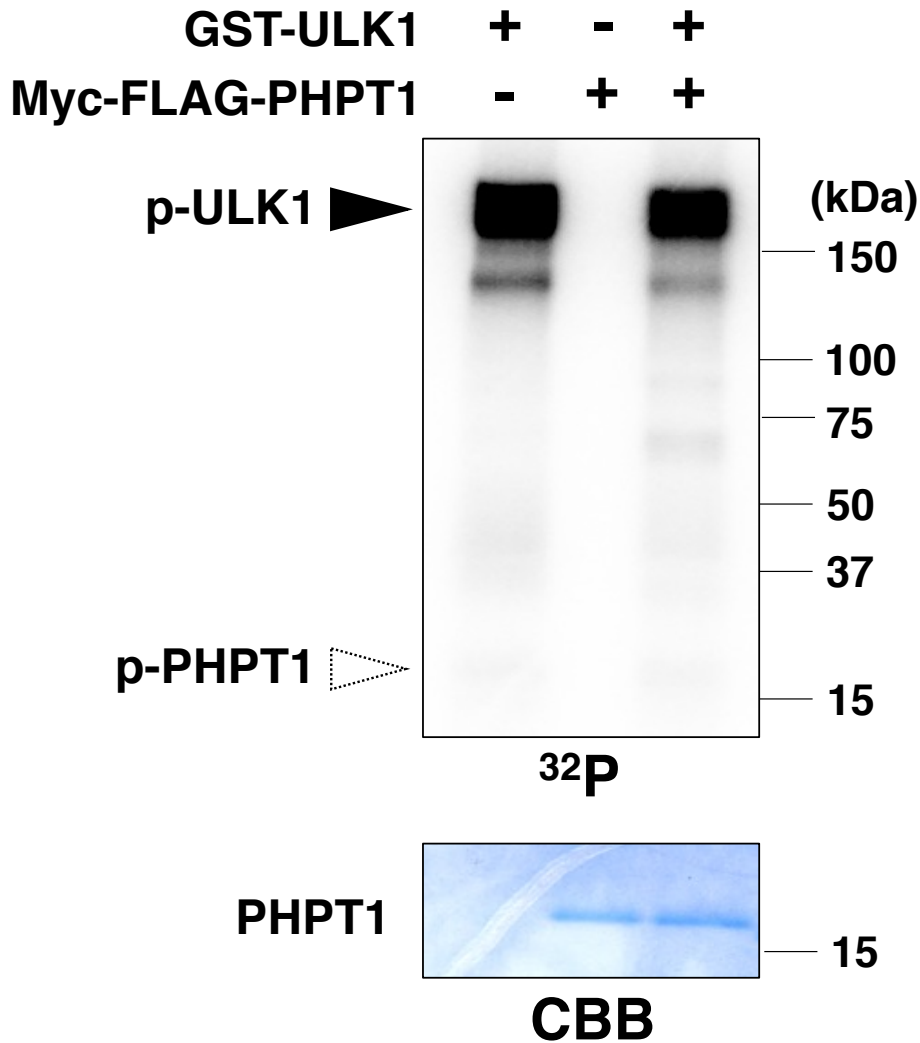**B**

|                          |     |               |            |              |             |     |
|--------------------------|-----|---------------|------------|--------------|-------------|-----|
| <i>C. elegans</i> PHIP-1 | 103 | <b>KYPDYN</b> | <b>IHF</b> | <b>SNDGY</b> | 116         |     |
| Human PHPT1              | 112 | <b>KYPDYE</b> | <b>V</b>   | <b>TW</b>    | <b>NDGY</b> | 125 |

**Appendix Figure S5. ULK1 does not phosphorylate PHPT1 in vitro.**

A Phosphorylation of PHPT1 by ULK1. HEK293 cells were transfected with Myc-FLAG-PHPT1, and cell lysates were immunoprecipitated with anti-FLAG antibodies. Immunopurified PHPT1 was subjected to the in vitro kinase assay with recombinant GST-ULK1 and phosphorylation was detected by autoradiography. Protein input was confirmed by Coomassie Brilliant Blue (CBB) staining. Black arrowhead indicates ULK1 autophosphorylation.

B Sequence alignments of the C-terminal domain of human PHPT1 and *C. elegans* PHIP-1. Identical and similar residues are highlighted with black and gray shading, respectively. Ser-112 (in PHIP-1) and Thr-119 (in PHPT1) are shown.
